# Supplementary material
Source: publisher figshare collection journal article supplement (https://tandf.figshare.com/ndownloader/files/29077268)
Supplement: Supplementary file 1 [file 29077268]

**SUPPLEMENTARY E**


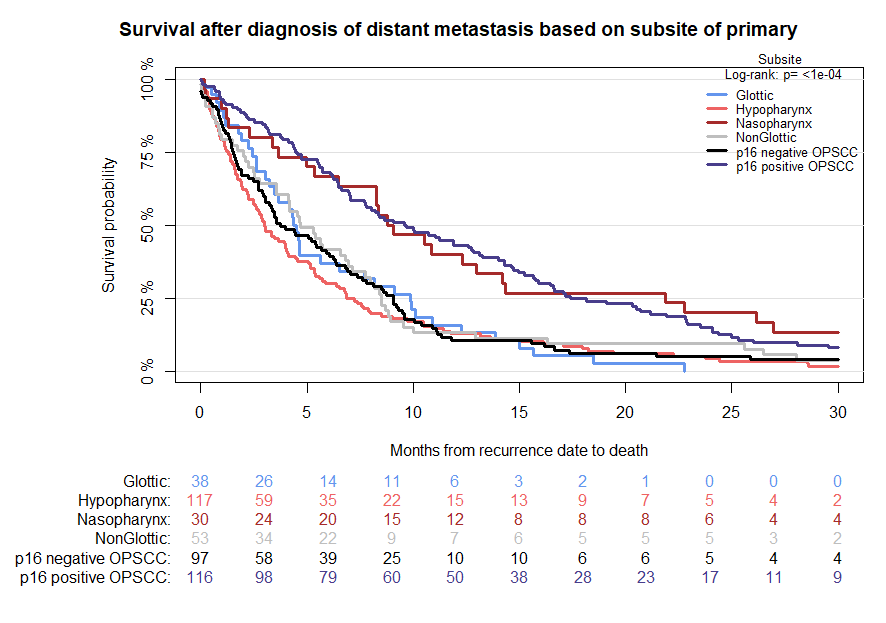


**Supplementary E:**  Kaplan Meier curves displaying survival after diagnosis of DM according to anatomical subsite of the primary tumor.
